# Supplementary material
Source: PubMed Central journal article supplement (PMC7136282)
Supplement: mmc1.pdf [file mmc1.pdf]

**Biophysical Journal, Volume 118**

**Supplemental Information**

**Recruitment of Ubiquitin within an E2 Chain Elongation Complex**

**Benjamin W. Cook, Rachel E. Lacoursiere, and Gary S. Shaw**

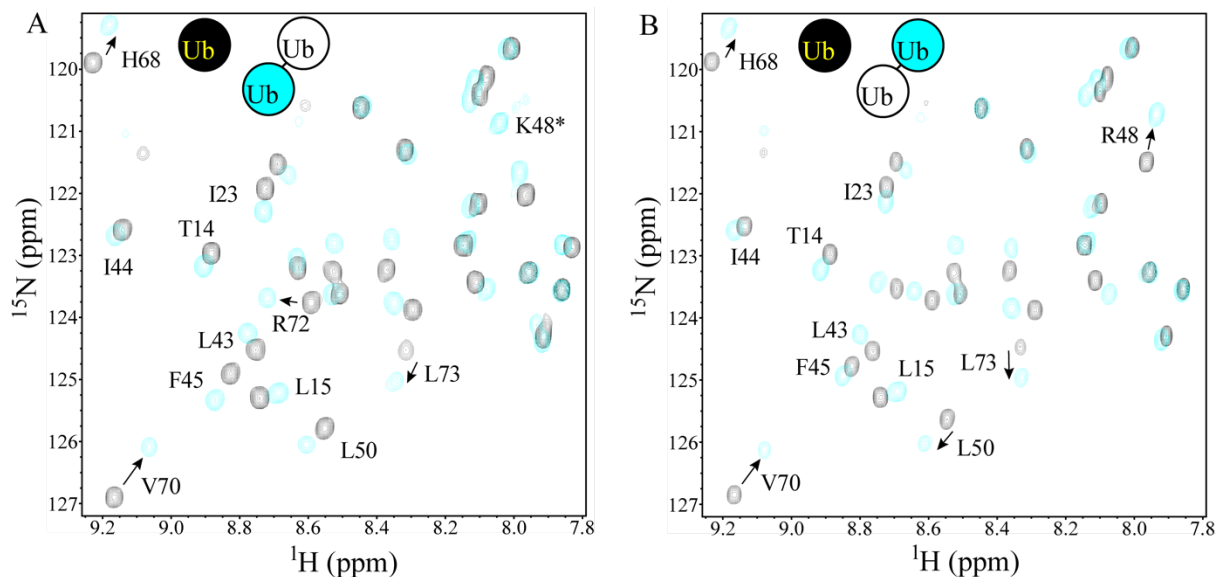

FIGURE S1. Region of  $^1\text{H}$ - $^{15}\text{N}$  HSQC of  $^{15}\text{N}$ -labeled Ub alone (black) and in Ub $^{\text{G76C}}$ -Ub $^{\text{K48R}}$  di-ubiquitin (cyan). In (A) the comparison of  $^{15}\text{N}$ -labeled Ub $^{\text{G76C}}$  is made with the proximal Ub $^{\text{G76C}}$  in Ub $^{\text{G76C}}$ -Ub $^{\text{K48R}}$ . In (B) the comparison of  $^{15}\text{N}$ -labeled Ub $^{\text{K48R}}$  is made with the distal Ub $^{\text{K48R}}$  in Ub $^{\text{G76C}}$ -Ub $^{\text{K48R}}$ . Signals that undergo chemical shift changes are labelled by residue and shift directions are indicated with arrows. K48\* represents the position of the side chain amide for K48 in Ub $^{\text{G76C}}$  that is linked to G76 of the distal Ub $^{\text{K48R}}$ .
